# Supplementary material for: AAV-mediated expression of a new conformational anti-aggregated α-synuclein antibody prolongs survival in a genetic model of α-synucleinopathies
Source: PubMed Central journal article supplement (PMC10272115; doi:10.1038/s41531-023-00542-9), 2023-06-15
Supplement: 41531_2023_542_MOESM1_ESM.pdf [file 41531_2023_542_MOESM1_ESM.pdf]

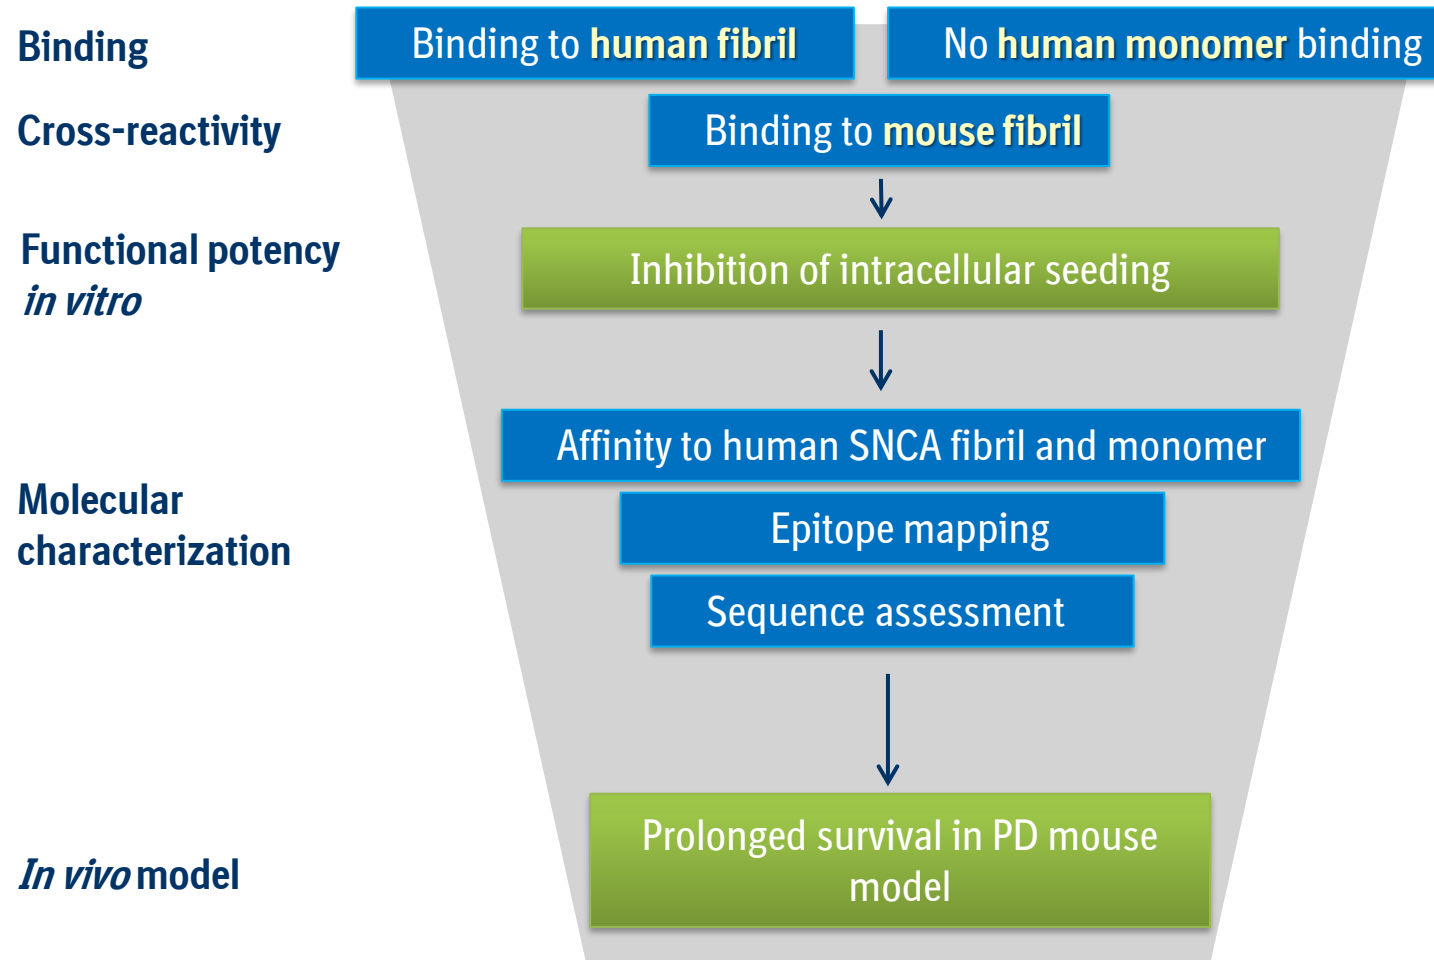

**Supplementary Figure 1. Screening cascade employed to identify fibril-specific anti- $\alpha$ -synuclein antibodies.**

Hybridoma supernatants were screened by ELISA for binding activity against fibrillar human and mouse  $\alpha$ -synuclein. Supernatants of hybridomas negative for binding towards monomeric human  $\alpha$ -synuclein were tested in a cellular assay assessing their capacity to block intracellular seeding (SH-SY5Y cells stably overexpressing mutant A53T human  $\alpha$ -synuclein). Selected clones were sequenced and underwent an epitope mapping (PepperPrint assay). Finally, 306C7B3 was tested in the described *in vivo* Parkinson's Disease (PD) model in (Thy-1)-[A30P]-h $\alpha$ -synuclein mice.

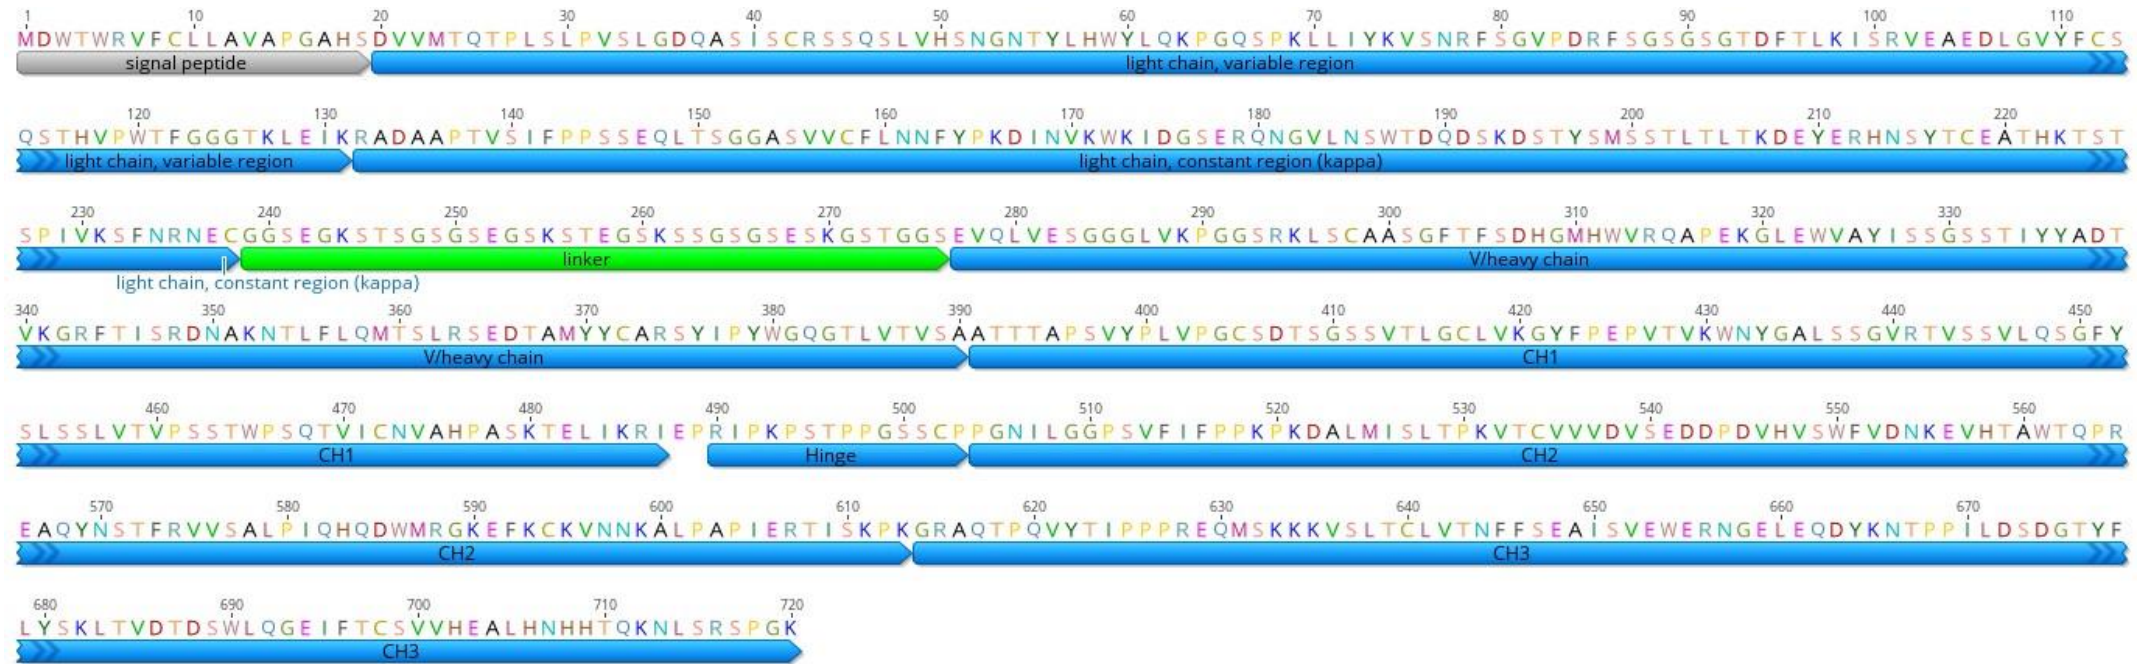

**Supplementary Figure 2a. Amino acid sequence of murine scIgG-306C7B3.**

Light and heavy chains are encoded within one single open reading frame due to the use of a linker sequence (green). The human IgG1 signal peptide was added to the primary antibody sequence to allow for efficient secretion of the scIgG from transduced cells (signal peptide).

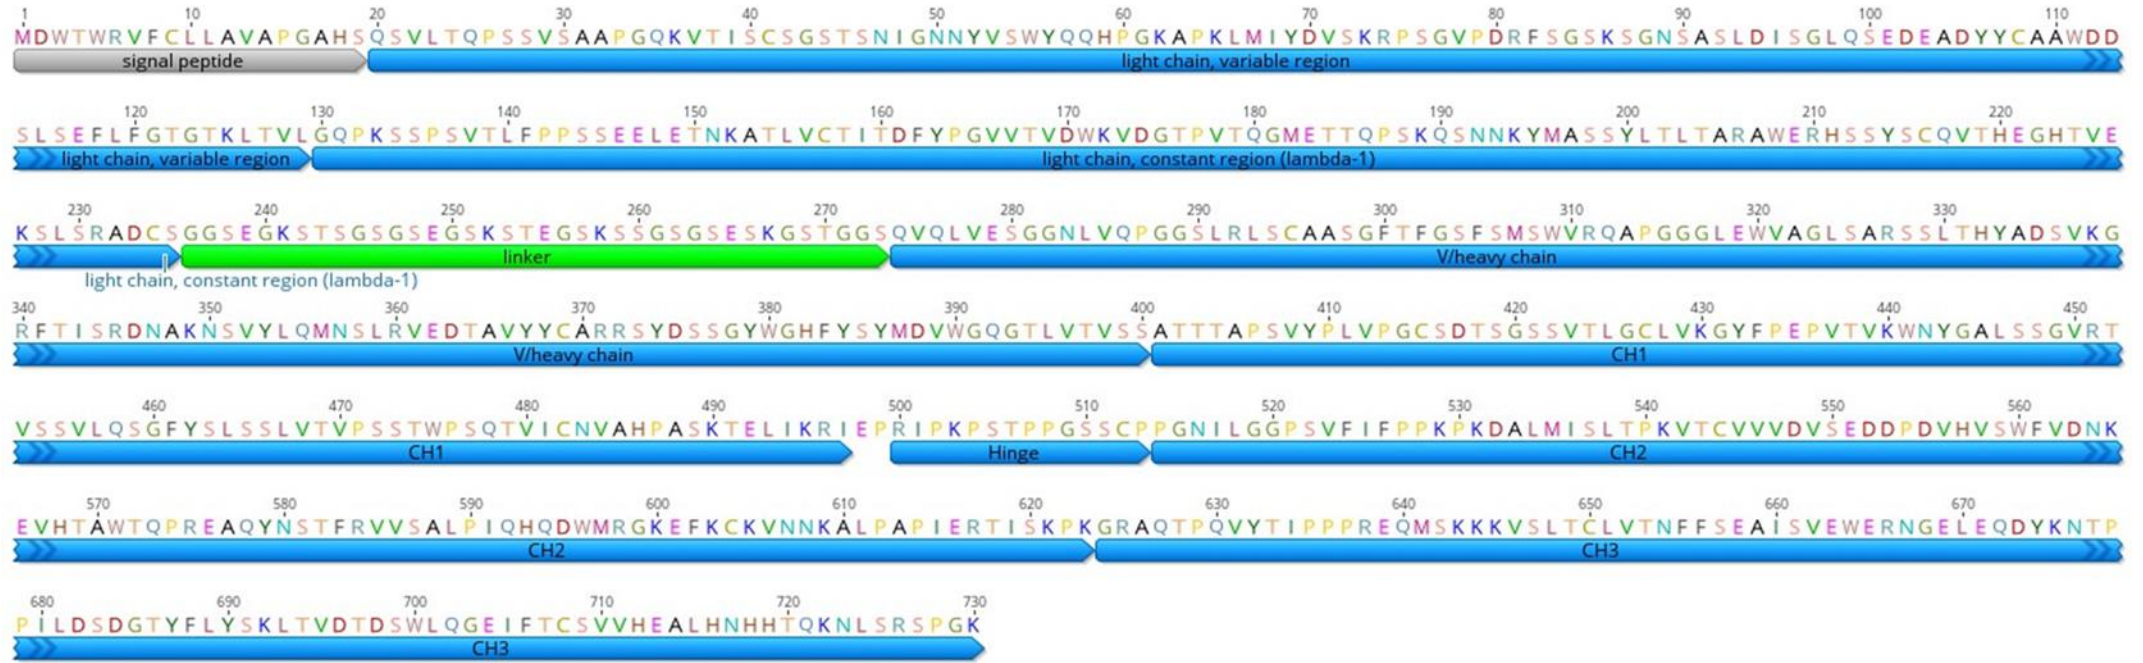

**Supplementary Figure 2b. Amino acid sequence of murine scIgG-anti-FITC.**

Light and heavy chains are encoded within one single open reading frame due to the use of a linker sequence (green). The human IgG1 signal peptide was added to the primary antibody sequence to allow for efficient secretion of the scIgG from transduced cells (signal peptide). The anti-FITC IgG sequence is derived from the scFv anti-FITC nanobody as described in Vaughan, T.J. et al. („Human antibodies with sub-nanomolar affinities isolated from a large non-immunized phage display library“. Nat. Biotechnol. 14, 309–314, 1996)

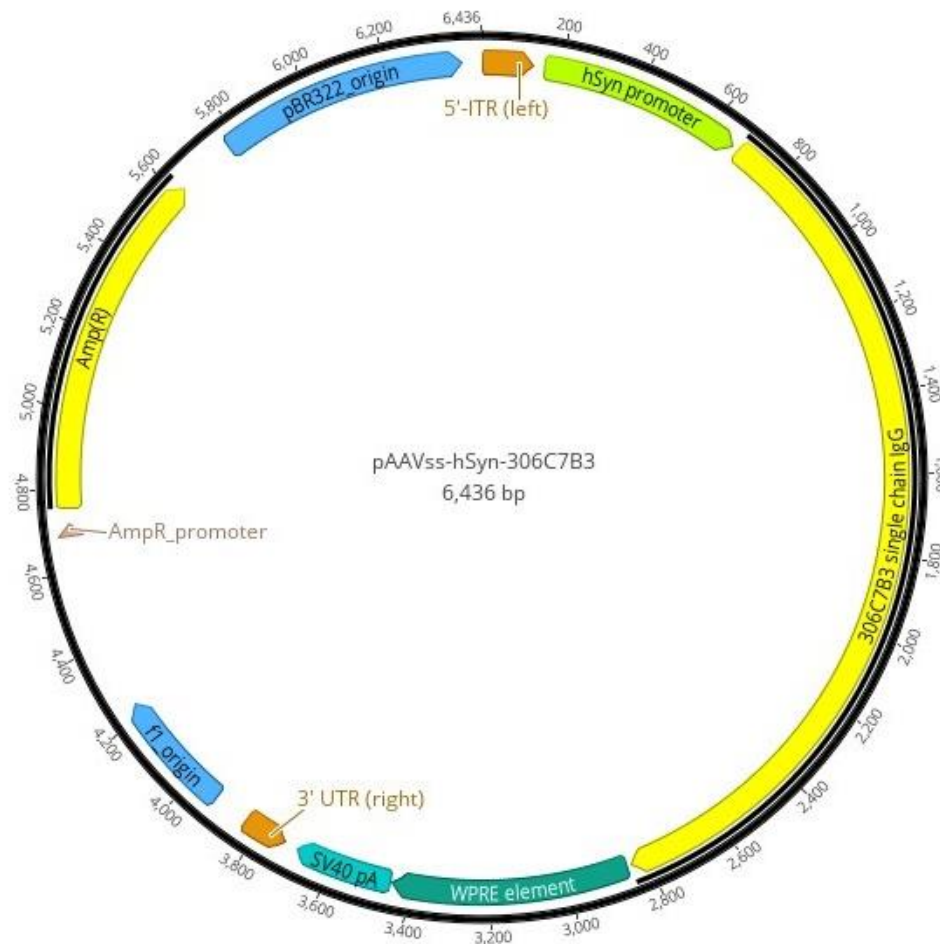

**Supplementary Figure 2c. Plasmid map of pAAVss-hSyn-sclgG-306C7B3.**

The expression cassette – flanked by the two inverted terminal repeats of AAV2 required for efficient packaging into AAV capsids – contains the human synapsin promoter (hSyn promoter), the full sclgG-306C7B3 antibody sequence in a single open reading frame including an optimized Kozak sequence, a WPRE element and the SV40 polyadenylation signal (SV40 pA).

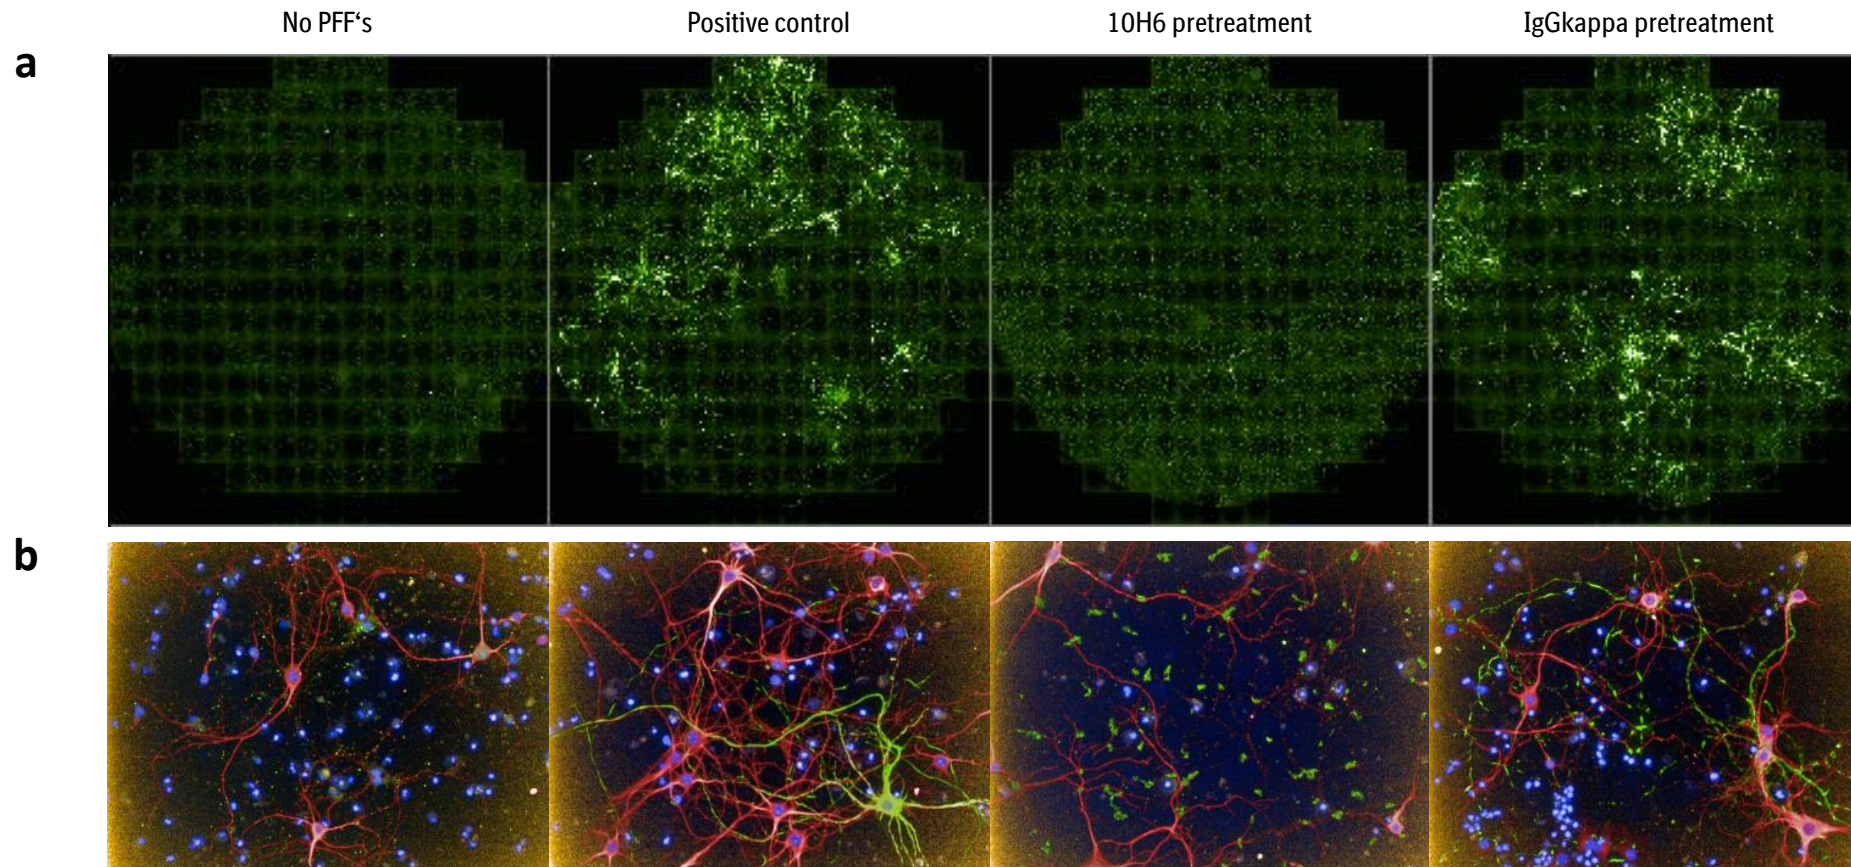

**Supplementary Figure 3. *In vitro* characterization of an aggregate specific  $\alpha$ -synuclein antibody on primary cortical neurons.**

Primary cortical neurons (E16.5, 5.000 cells/well) from (Thy-1)-[A30P]- $\alpha$ -synuclein mice overexpressing mutant A30P  $\alpha$ -synuclein were incubated with 100ng of PFF human  $\alpha$ -synuclein either untreated or pre-incubated with 1 $\mu$ g 10H6 prior to addition to the culture medium. 10H6 represents an aggregate-specific anti-human  $\alpha$ -synuclein antibody similar to 306C7B3. After 21 days of *in vitro* culture, cells were fixed and stained for pSer129  $\alpha$ -synuclein (green) and MAP2 (red) as neuronal marker (DAPI nuclear staining in blue).

**a**, full plate view (96well microtiter plate) showing pSER129  $\alpha$ -synuclein stain only, indicating induced intracellular  $\alpha$ -synuclein aggregation as marked by the pSer phosphorylation in the positive control as well as in primary neurons treated with a control antibody ("IgGkappa"). No intracellular pSer129  $\alpha$ -synuclein staining can be observed in 10H6 pretreated primary neurons. **b** Higher magnification showing individual neurons (marked by the red MAP2 staining). Note the presence of dot-like green immuno-fluorescence outside of neuronal cell bodies and axons, most likely due to a cross-reaction of the utilized secondary antibody for the pSer129 stain with the Fc-region of the 10H6 antibody bound to the human  $\alpha$ -synuclein PFF's still present on the culture dish.

**a** MSA frontal

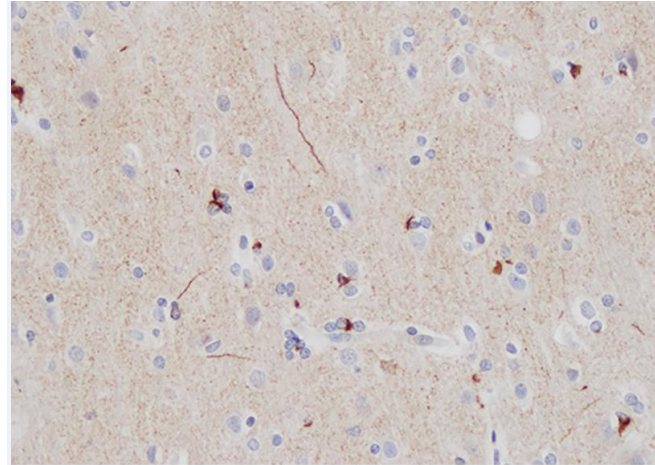

**b** MSA putamen

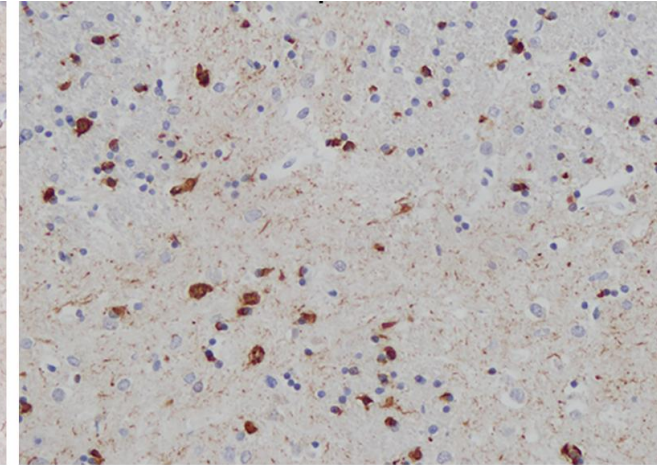

**c** MSA pons

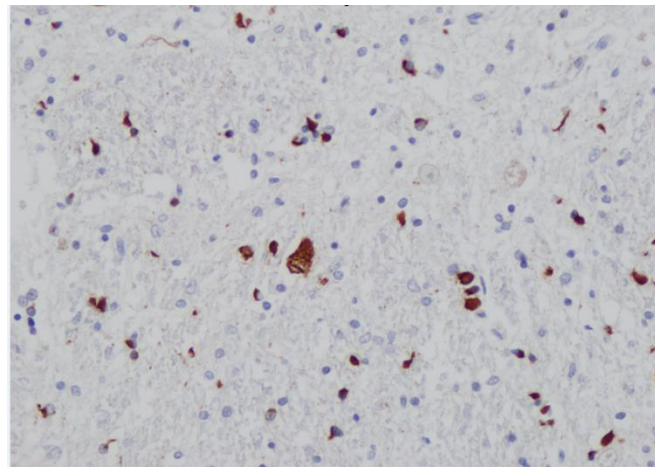

**d** DLB cingulate

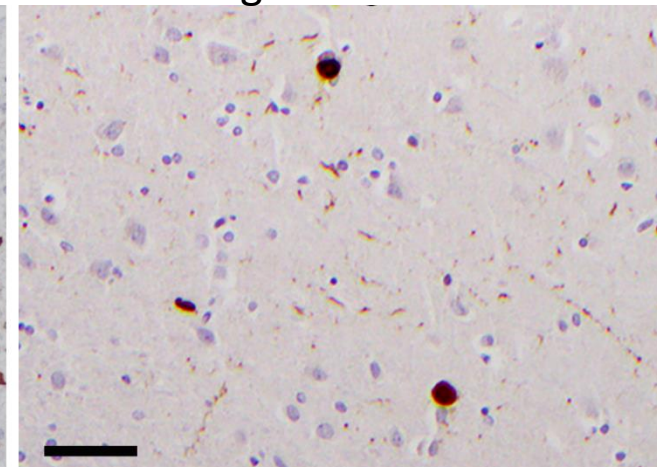

**Supplementary Figure 4. 306C7B3 immunoreactivity in multiple system atrophy and Lewy body disease.**

Immunohistochemistry for 306C7B3 in formalin-fixed paraffin embedded section of human postmortem tissue of  $\alpha$ -synucleinopathies. Robust immunoreactivity is observed for all types of inclusions in MSA including cortical and subcortical neuronal and oligodendroglial inclusions in frontal cortex (**a**), putamen (**b**), and pons (**c**). In Lewy body diseases, strong labelling of Lewy bodies and Lewy neurites is seen as illustrated in cingulate gyrus of dementia with Lewy body case (**d**). Scale bar 50 $\mu$ m (a-d).

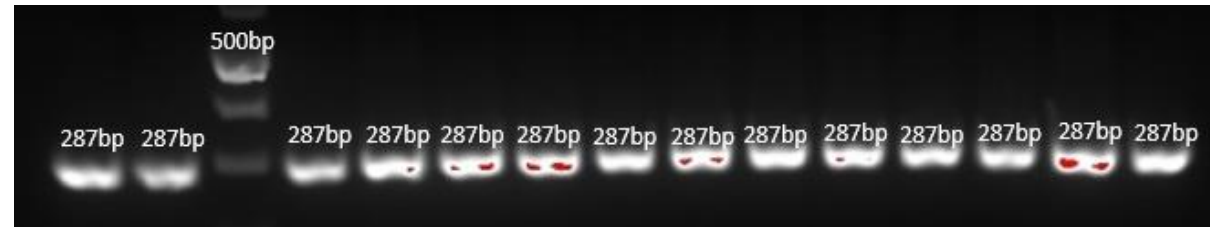

**Supplementary Figure 5. Confirmatory biochemical analysis of all animals involved in the *in vivo* study.**

Gel electrophoresis example showing the result of the genotype analysis via PCR. All animals in the study were shown to be homozygous for the A30P  $\alpha$ -synuclein transgene as indicated by the amplified 287 bp band from genomic DNA isolated from each individual animal.

|                                                        |           | Gender  | loss of righting reflex | age at sacrifice                 |                                                    |
|--------------------------------------------------------|-----------|---------|-------------------------|----------------------------------|----------------------------------------------------|
| Group                                                  | animal ID | (m / f) | (yes / no)              | (days)                           | comments                                           |
| control                                                | 8         | m       | yes                     | 475                              |                                                    |
|                                                        | 9         | f       | yes                     | 605                              |                                                    |
|                                                        | 10        | f       | yes                     | 535                              |                                                    |
|                                                        | 12        | f       | yes                     | 574                              |                                                    |
|                                                        | 13        | m       | no                      | 466                              | found dead in cage                                 |
|                                                        | 14        | m       | no                      | 551                              | large wound in the back and at the ear, euthanized |
|                                                        | 15        | m       | yes                     | 666                              |                                                    |
|                                                        | 16        | f       | yes                     | 522                              |                                                    |
|                                                        | 17        | f       | yes                     | 429                              |                                                    |
|                                                        | 18        | f       | yes                     | 597                              |                                                    |
|                                                        | 19        | f       | yes                     | 488                              |                                                    |
|                                                        | 20        | f       | yes                     | 590                              |                                                    |
|                                                        | 111       | f       | yes                     | 500                              |                                                    |
|                                                        | 112       | f       | yes                     | 548                              |                                                    |
|                                                        | 172       | m       | yes                     | 674                              |                                                    |
|                                                        | 173       | m       | yes                     | 612                              |                                                    |
|                                                        | 174       | m       | yes                     | 678                              |                                                    |
|                                                        | 175       | f       | no                      | 626                              | rectum prolapse, euthanized                        |
|                                                        | 176       | f       | yes                     | 554                              |                                                    |
| 177                                                    | f         | no      | 575                     | found dead in cage               |                                                    |
| 178                                                    | f         | no      | 443                     | found dead in cage               |                                                    |
| high dose<br>AAV2HBKO-<br>sclgG-antiFITC<br>2.0E+10 vg | 1         | f       | yes                     | 458                              |                                                    |
|                                                        | 2         | f       | yes                     | 468                              |                                                    |
|                                                        | 3         | f       | yes                     | 544                              |                                                    |
|                                                        | 4         | f       | yes                     | 593                              |                                                    |
|                                                        | 5         | m       | yes                     | 451                              |                                                    |
|                                                        | 6         | m       | yes                     | 617                              |                                                    |
|                                                        | 7         | m       | yes                     | 640                              |                                                    |
|                                                        | 8         | m       | yes                     | 493                              |                                                    |
|                                                        | 143       | f       | yes                     | 458                              |                                                    |
|                                                        | 144       | f       | yes                     | 665                              |                                                    |
|                                                        | 146       | m       | yes                     | 591                              |                                                    |
|                                                        | 147       | m       | yes                     | 540                              |                                                    |
|                                                        | 168       | m       | yes                     | 626                              |                                                    |
|                                                        | 169       | m       | yes                     | 674                              |                                                    |
|                                                        | 170       | m       | yes                     | 542                              |                                                    |
| 171                                                    | m         | no      | -                       | euthanized shortly after surgery |                                                    |
| low dose                                               | 1         | f       | yes                     | 576                              |                                                    |
|                                                        | 2         | f       | yes                     | 564                              |                                                    |
|                                                        | 3         | f       | yes                     | 591                              |                                                    |



|                                                   |     |   |     |     |                                                  |
|---------------------------------------------------|-----|---|-----|-----|--------------------------------------------------|
| AAV2HBKO-sclgG-306C7B3<br>2.0E+09 vg              | 4   | f | no  | -   | general deterioration shortly after surgery      |
|                                                   | 5   | m | no  | 589 | self inflicted large scale scratches, euthanized |
|                                                   | 6   | m | yes | 607 |                                                  |
|                                                   | 7   | m | yes | 673 |                                                  |
|                                                   | 8   | m | no  | -   | general deterioration shortly after surgery      |
|                                                   | 17  | m | yes | 603 |                                                  |
|                                                   | 18  | m | yes | 602 |                                                  |
|                                                   | 19  | m | no  | -   | general deterioration shortly after surgery      |
|                                                   | 148 | f | no  | 455 | vaginal prolapse, euthanized                     |
|                                                   | 149 | f | no  | -   | general deterioration shortly after surgery      |
|                                                   | 150 | m | yes | 654 |                                                  |
|                                                   | 151 | m | yes | 644 |                                                  |
| mid dose<br>AAV2HBKO-sclgG-306C7B3<br>6.3E+09 vg  | 9   | f | yes | 566 |                                                  |
|                                                   | 10  | f | yes | 577 |                                                  |
|                                                   | 11  | f | yes | 613 |                                                  |
|                                                   | 12  | f | yes | 544 |                                                  |
|                                                   | 13  | m | yes | 508 |                                                  |
|                                                   | 14  | m | yes | 638 |                                                  |
|                                                   | 15  | m | no  | 533 | rectum prolapse, euthanized                      |
|                                                   | 105 | m | yes | 669 |                                                  |
|                                                   | 152 | f | yes | 558 |                                                  |
|                                                   | 153 | f | yes | 634 |                                                  |
|                                                   | 154 | m | yes | 544 |                                                  |
|                                                   | 155 | m | yes | 586 |                                                  |
|                                                   | 164 | f | yes | 610 |                                                  |
|                                                   | 165 | f | yes | 557 |                                                  |
|                                                   | 166 | m | no  | -   | general deterioration shortly after surgery      |
| high dose<br>AAV2HBKO-sclgG-306C7B3<br>2.0E+10 vg | 17  | f | yes | 538 |                                                  |
|                                                   | 18  | f | yes | 628 |                                                  |
|                                                   | 19  | f | yes | 564 |                                                  |
|                                                   | 20  | f | yes | 506 |                                                  |
|                                                   | 101 | m | yes | 660 |                                                  |
|                                                   | 102 | m | yes | 475 |                                                  |
|                                                   | 103 | m | yes | 736 |                                                  |
|                                                   | 104 | m | no  | 572 | rectum prolapse, euthanized                      |
|                                                   | 139 | f | no  | 566 | large, focal swelling at tail, euthanized        |
|                                                   | 140 | f | no  | 560 | large weeping wound at left leg, euthanized      |
|                                                   | 141 | m | yes | 532 |                                                  |

|  |     |   |     |     |                                                   |
|--|-----|---|-----|-----|---------------------------------------------------|
|  | 142 | m | yes | 588 |                                                   |
|  | 159 | m | yes | 674 |                                                   |
|  | 160 | m | no  | -   | general deterioration shortly after surgery       |
|  | 161 | m | no  | 681 | general deterioration, no loss of righting reflex |
|  | 162 | m | yes | 688 |                                                   |
|  | 163 | m | yes | 625 |                                                   |

**Supplementary Table 1.**

Individual animal data for the *in vivo* functional study. Only animals with clear loss of righting reflex were included in the analysis. See comments for animals euthanized or found dead without loss of righting reflex.
